# Supplementary material for: Fluorescent N-functionalized carbon nanodots from carboxymethylcellulose for sensing of high-valence metal ions and cell imaging
Source: Royal Society of Chemistry journal article supplement (doi:10.1039/d1ra04972k), 2021-01-01
Supplement: d1ra04972k1.pdf [file d1ra04972k1.pdf]

## Supporting Information

### **Fluorescent N-functionalized carbon nanodots from carboxymethylcellulose for sensing of high-valence metal ions and cell imaging**

Zhenzhen Liu <sup>c</sup>, Runsen Li <sup>c</sup>, Yan Li <sup>c</sup>, Jingpeng Zhou <sup>d</sup>, Yumei Gong <sup>c</sup>, Haiqiang Shi <sup>c</sup>,  
Yanzhu Guo <sup>a, b, c, d</sup> \*, Haiming Li <sup>c</sup> \*, Zhiwei Wang <sup>a</sup> \* and Fengshan Zhang <sup>d</sup>

<sup>a</sup> Guangxi Key Laboratory of Clean Pulp & Papermaking and Pollution Control, School of  
Light Industry and Food Engineering, Guangxi University, Nanning, 530004, China.

<sup>b</sup> State Key Laboratory of Pulp and Paper Engineering, South China University of  
Technology, Guangzhou, 510641, China.

<sup>c</sup> Liaoning Key Laboratory of Pulp and Paper Engineering, Dalian Polytechnic University,  
Dalian, 116034, China.

<sup>d</sup> Shandong Huatai Paper Co., Ltd., Dongying, 275335, China.

\*Corresponding Authors E-mail: guoyz@dlpu.edu.cn (Yanzhu Guo), lihm@dlpu.edu.cn  
(Haiming Li), wangzhiwei@gxu.edu.cn; Tel.: +86-15164033963 (Yanzhu Guo).

**Table S1.** QY of carbon dots prepared under various reaction conditions

| Samples            | CMC/N source<br>(mass ratio) | Temperatur<br>e (°C) | Time<br>(h) | QYs<br>(%) |
|--------------------|------------------------------|----------------------|-------------|------------|
| CDs <sup>a</sup>   | 1:0                          | 220                  | 36          | 4.9        |
| N-CDs <sup>b</sup> | 1:0.15                       | 220                  | 36          | 13.1       |
| N-CDs <sup>b</sup> | 1:0.45                       | 220                  | 36          | 19.2       |
| N-CDs <sup>b</sup> | 1:0.75                       | 220                  | 36          | 22.9       |
| N-CDs <sup>b</sup> | 1:0.90                       | 220                  | 36          | 21.6       |
| N-CDs <sup>b</sup> | 1:0.75                       | 180                  | 36          | 7.8        |
| N-CDs <sup>b</sup> | 1:0.75                       | 200                  | 36          | 13.1       |
| N-CDs <sup>b</sup> | 1:0.75                       | 240                  | 36          | 21.7       |
| N-CDs <sup>c</sup> | 1:0.75                       | 220                  | 36          | 15.4       |
| N-CDs <sup>d</sup> | 1:0.75                       | 220                  | 36          | 14.7       |
| N-CDs <sup>e</sup> | 1:0.75                       | 220                  | 36          | 10.9       |
| N-CDs <sup>f</sup> | 1:0.75                       | 220                  | 36          | 13.4       |

Reaction conditions: <sup>a</sup> CMC (M.W. 90000 g/mol); <sup>b</sup> CMC (M.W. 90000 g/mol), ethylenediamine (EDA); <sup>c</sup> CMC (M.W. 250000 g/mol), ethylenediamine (EDA); <sup>d</sup> CMC (M.W. 700000 g/mol), ethylenediamine (EDA); <sup>e</sup> CMC (M.W. 90000 g/mol), 1,2-propanediamine; <sup>f</sup> CMC (M.W. 90000 g/mol), 1,6-hexamethylenediamine.

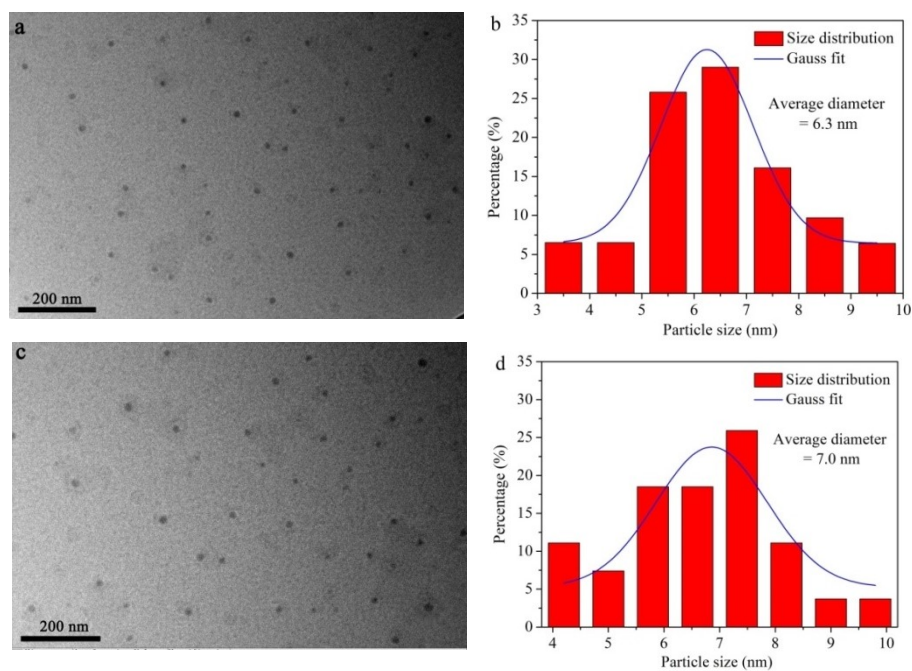

**Fig. S1** TEM images and particle size distributions of N-CDs samples. Conditions: (a, b) CMC (M.W. 250000 g/mol), (c, d) CMC (M.W. 700000 g/mol).

**Table S2.** The contents of C, O and N elements in CMC, CDs and N-CDs samples by XPS analysis

| Elemental composition | Samples |        |        |
|-----------------------|---------|--------|--------|
|                       | CMC     | CDs    | N-CDs  |
| C                     | 57.98%  | 61.10% | 68.75% |
| O                     | 40.22%  | 29.28% | 11.90% |
| N                     | -       | -      | 19.35% |

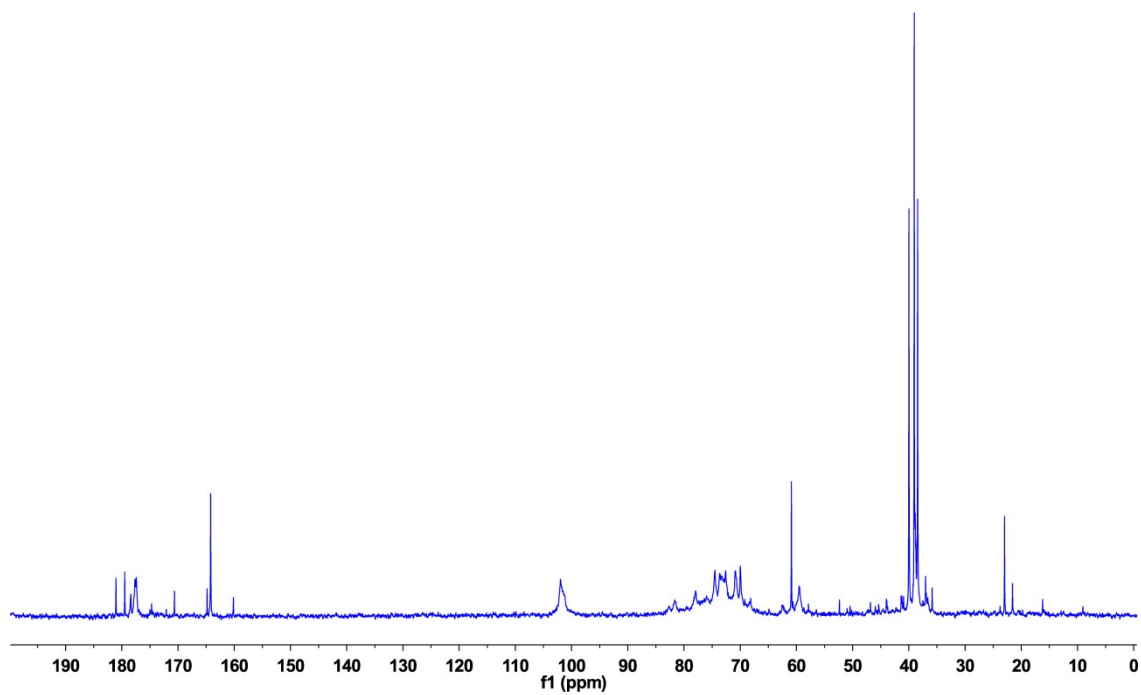

**Fig. S2**  $^{13}\text{C}$ -NMR spectrum of N-CDs in  $\text{D}_2\text{O}$ .

**Table S3.** Fe<sup>3+</sup> sensing comparison with other sensors.

| Sources                | Passivators     | Linear range<br>( $\mu\text{M}$ ) | $K_{\text{SV}}$ ( $\text{M}^{-1}$ ) | LOD<br>( $\mu\text{M}$ ) | Ref.      |
|------------------------|-----------------|-----------------------------------|-------------------------------------|--------------------------|-----------|
| Alginic acid           | Ethanediamine   | 0-50                              | 2390                                | 10.98                    | [S1]      |
| Vitamin B1             | Ethylenediamine | 0.1-1000                          | -                                   | 0.177                    | [S2]      |
| pyrocatechol           | Ethylenediamine | 5-600                             | -                                   | 1.20                     | [S3]      |
| graphite               | -               | 10-200                            | -                                   | 1.80                     | [S4]      |
| L-glutamic acid        | -               | 0-50                              | -                                   | 4.67                     | [S5]      |
| P. acidus fruits       | Ammonia         | 2-25                              | -                                   | 0.90                     | [S6]      |
| Blueberry              | -               | 12.5-100                          | 3148                                | 9.97                     | [S7]      |
| $\alpha$ -cyclodextrin | -               | 16-166                            | -                                   | 6.05                     | [S8]      |
| P. avium fruits        | Ammonia         | 0-100                             | 2095.8                              | 0.96                     | [S9]      |
| DL-malic acid          | Ethanolamine    | 6-200                             | 2460                                | 0.80                     | [S10]     |
| CMC                    | Ethylenediamine | 0-1000                            | 4550                                | 0.8                      | This work |

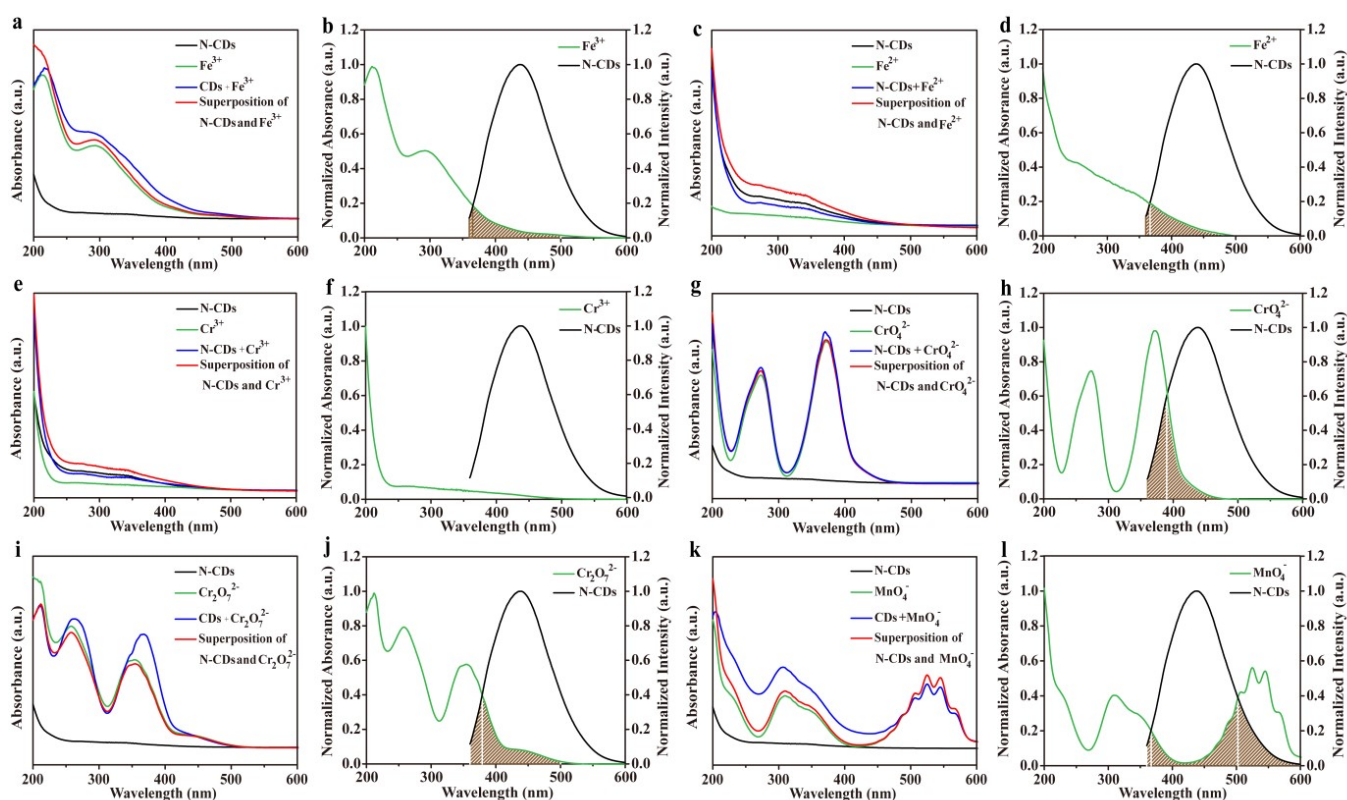

**Fig. S3** UV-vis spectra of N-CDs before/after addition of Fe<sup>3+</sup> (a, b), Fe<sup>2+</sup> (c, d), Cr<sup>3+</sup> (e, f), CrO<sub>4</sub><sup>2-</sup> (g, h), Cr<sub>2</sub>O<sub>7</sub><sup>2-</sup> (i, j) and MnO<sub>4</sub><sup>-</sup> (k, l) and the spectra overlaps between N-CDs and various types of ions.

**Table S4.** Fluorescence recovery of “turn off-on” sensing system by different reductive agents

| Reducing acid               | $F_R/F_F$ |           |              |                | Recovery rate (%) |           |              |                |
|-----------------------------|-----------|-----------|--------------|----------------|-------------------|-----------|--------------|----------------|
|                             | $Fe^{3+}$ | $MnO_4^-$ | $CrO_4^{2-}$ | $Cr_2O_7^{2-}$ | $Fe^{3+}$         | $MnO_4^-$ | $CrO_4^{2-}$ | $Cr_2O_7^{2-}$ |
| $Ti^{3+}$                   | 8.1       | 14.3      | 10.5         | 11.1           | 96.4              | 58.8      | 87.4         | 84.8           |
| ascorbic acid               | 3.7       | 12.9      | 6.5          | 2.4            | 58.7              | 52.7      | 50.6         | 12.1           |
| $Sn^{4+}$                   | 2.6       | 3.6       | 3.5          | 1.3            | 22.3              | 11.8      | 23.4         | 2.6            |
| hydroxylamine hydrochloride | 1.4       | 1.6       | 1.6          | 0.6            | 6.3               | 3.0       | 5.6          | -              |
| GSH                         | 1.1       | 7.1       | 1.3          | 0.4            | 2.1               | 26.7      | 3.3          | -              |

## References

- [S1] Y. Liu, Y. Liu, S. Park, Y. Zhang, T. Kim, S. Chae, M. Park and H. Kim, *J. Mater. Chem. A*, 2015, **3** 17747
- [S2] F. Wu, M. Yang, H. Zhang, S. Zhu, X. Zhu and K. Wang, *Opt. Mater.*, 2018, **77**, 258.
- [S3] F. Niu, Y. Ying, X. Hua, Y. Niu, Y. Xu and Y. Long, *Carbon*, 2018, **127**, 340.
- [S4] M. Liu, Y. Xu, F. Niu, J. J. Gooding and J. Liu, *Analyst*, 2016, **141**, 2657.
- [S5] J. Yu, C. Xu, Z. Tian, Y. Lin and Z. Shi, *New J. Chem.*, 2016, **40**, 2083.
- [S6] R. Atchudan, T. N. J. I. Edison, K. R. Aseer, S. Perumal, N. Karthik and Y. R. Lee, *Biosens. Bioelectron.*, 2018, **99**, 303.
- [S7] A. M. Aslandaş, N. Balcı, M. Arık, H. Şakiroğlu, Y. Onganer and K. Meral, *Appl. Surf. Sci.*, 2015, **356**, 747.
- [S8] H. Hamishehkar, B. Ghasemzadeh, A. Naseri, R. Salehi and F. Rasoulzadeh, *Spectrochim. Acta A*, 2015, **150**, 934.
- [S9] T. N. J. I. Edison, R. Atchudan, J. J. Shim, S. Kalimuthu, B. C. Ahn, and Y. R. Lee, *J. Photoch. Photobio. B*, 2016, **158**, 235.
- [S10] W. Lu, X. Gong, M. Nan, Y. Liu, S. Shuang and C. Dong, *Anal. Chim. Acta*, 2015, **898**, 116.
